# Supplementary material for: Proteomics analysis of fetal growth restriction and taurine-treated fetal growth restriction rat brain tissue by 2D DIGE and MALDI-TOF/TOF MS analysis
Source: PubMed Central journal article supplement — Int J Mol Med. 2019 May 7;44(1):207–17. doi: 10.3892/ijmm.2019.4182 (PMC6559329; doi:10.3892/ijmm.2019.4182), 2019-05-07
Supplement: Supplementary_Data.pdf [file Supplementary_Data.pdf]

Table SI. Spots detected via MALDI/TOF/TOF mass spectrometry analysis following two-dimensional difference gel electrophoresis.

| Spot ID | Match ID | Pixel X | Pixel Y | Intensity | Area    | Vol     | %Vol     | Saliency | Sel |
|---------|----------|---------|---------|-----------|---------|---------|----------|----------|-----|
| 869     | 10       | 2446    | 2486    | 4552      | 9.09683 | 14816   | 0.108807 | 1129.4   | 1   |
| 836     | 30       | 1903    | 2073    | 31015     | 13.4696 | 183824  | 1.34999  | 15059.6  | 1   |
| 807     | 54       | 2122    | 1897    | 6958      | 8.53052 | 24674.8 | 0.181209 | 0        | 1   |
| 793     | 58       | 1763    | 1840    | 5498      | 4.98211 | 10257.8 | 0.075332 | 2295.5   | 1   |
| 791     | 59       | 1905    | 1860    | 34473     | 17.1471 | 289458  | 2.12575  | 18142.4  | 1   |
| 768     | 72       | 1538    | 1748    | 5738      | 4.03587 | 8903.75 | 0.065388 | 2322.55  | 1   |
| 655     | 170      | 1264    | 1330    | 9670      | 5.26168 | 20314.7 | 0.149189 | 4607.47  | 1   |
| 639     | 180      | 1389    | 1299    | 5490      | 4.90325 | 9960.1  | 0.073146 | 1957.35  | 1   |
| 638     | 179      | 1940    | 1291    | 4168      | 2.91758 | 4787.73 | 0.035161 | 1530.05  | 1   |
| 635     | 183      | 1627    | 1286    | 4472      | 3.06812 | 5555.66 | 0.0408   | 1801.64  | 1   |
| 597     | 216      | 1720    | 1186    | 8442      | 3.276   | 10591.2 | 0.07778  | 3615.4   | 1   |
| 583     | 230      | 2106    | 1157    | 3280      | 3.54841 | 4815.57 | 0.035365 | 822.767  | 1   |
| 542     | 273      | 1622    | 1069    | 12902     | 5.16132 | 24777   | 0.18196  | 4550.38  | 1   |
| 505     | 304      | 1992    | 995     | 9544      | 4.15056 | 16419.6 | 0.120584 | 0        | 1   |
| 503     | 308      | 1949    | 995     | 20210     | 5.56992 | 44194.2 | 0.324558 | 10062.9  | 1   |
| 493     | 321      | 1928    | 964     | 4336      | 2.60933 | 4215.81 | 0.030961 | 1619.57  | 1   |
| 419     | 399      | 698     | 884     | 8128      | 5.68462 | 15611.7 | 0.114651 | 0        | 1   |
| 406     | 406      | 2157    | 877     | 18138     | 4.02153 | 29549.8 | 0.217011 | 7812.54  | 1   |
| 354     | 451      | 1662    | 834     | 26843     | 9.27604 | 117257  | 0.861122 | 9629.09  | 1   |
| 344     | 465      | 1210    | 808     | 14086     | 4.35845 | 23997   | 0.176232 | 7279.73  | 1   |
| 343     | 460      | 971     | 807     | 10540     | 3.7778  | 16314.7 | 0.119814 | 5059.15  | 1   |
| 320     | 476      | 1821    | 774     | 21598     | 4.75988 | 44851.5 | 0.329385 | 10836.9  | 1   |
| 306     | 490      | 1613    | 761     | 18180     | 4.07171 | 34453.7 | 0.253025 | 8456.96  | 1   |
| 298     | 493      | 2169    | 751     | 5134      | 2.98926 | 5921.67 | 0.043488 | 1951.69  | 1   |
| 291     | 509      | 1277    | 747     | 8286      | 4.34411 | 13489.5 | 0.099066 | 3580.25  | 1   |
| 259     | 761      | 654     | 719     | 10958     | 3.3692  | 15210.5 | 0.111704 | 4542.48  | 1   |
| 255     | 916      | 1767    | 707     | 3162      | 3.31902 | 3469.35 | 0.025479 | 905.228  | 1   |
| 155     | 581      | 1505    | 615     | 22740     | 6.1434  | 64754   | 0.475547 | 11004.2  | 1   |
| 146     | 593      | 1671    | 609     | 18298     | 7.8065  | 62672.4 | 0.46026  | 9063.75  | 1   |
| 104     | 609      | 1916    | 517     | 27871     | 3.34769 | 51460.3 | 0.377919 | 7591.98  | 1   |
| 921     | 10       | 2460    | 2380    | 4600      | 7.74915 | 13274.3 | 0.091223 | 724.944  | 1   |
| 874     | 30       | 1952    | 2015    | 32823     | 13.2402 | 193627  | 1.33063  | 17875    | 1   |
| 839     | 54       | 2149    | 1845    | 8590      | 8.03589 | 27968.8 | 0.192206 | 2980.21  | 1   |
| 827     | 58       | 1821    | 1805    | 7188      | 4.83874 | 12187.6 | 0.083755 | 2687.65  | 1   |
| 824     | 59       | 1951    | 1817    | 37165     | 18.4087 | 353357  | 2.42832  | 21532.1  | 1   |
| 794     | 72       | 1611    | 1727    | 8970      | 3.94268 | 10190.1 | 0.070028 | 2709.15  | 1   |
| 680     | 170      | 1338    | 1345    | 12234     | 4.75988 | 22145.6 | 0.152188 | 4768.12  | 1   |
| 665     | 180      | 1456    | 1309    | 7288      | 3.98569 | 10107.3 | 0.069459 | 2916.04  | 1   |
| 652     | 183      | 1682    | 1286    | 5124      | 3.01794 | 6059.52 | 0.041642 | 1681.01  | 1   |
| 650     | 179      | 1974    | 1285    | 7108      | 2.79572 | 7548.16 | 0.051872 | 2314.48  | 1   |
| 606     | 216      | 1768    | 1189    | 9940      | 3.21149 | 12158.5 | 0.083555 | 3572.48  | 1   |
| 575     | 230      | 2135    | 1155    | 2962      | 4.75272 | 4503.91 | 0.030952 | 428.365  | 1   |
| 532     | 273      | 1669    | 1077    | 11580     | 4.07888 | 17769.2 | 0.122113 | 3836.81  | 1   |
| 491     | 304      | 2018    | 1008    | 14680     | 4.50182 | 26570.7 | 0.182598 | 4902.35  | 1   |
| 486     | 308      | 1975    | 1008    | 23753     | 6.02871 | 58810.1 | 0.404151 | 10605.4  | 1   |
| 462     | 321      | 1955    | 975     | 6478      | 2.27241 | 5295.56 | 0.036392 | 2634.4   | 1   |
| 407     | 399      | 719     | 930     | 8280      | 5.12548 | 17057.3 | 0.11722  | 2446.56  | 1   |
| 375     | 406      | 2178    | 890     | 15694     | 3.47672 | 22426.6 | 0.154119 | 6645.6   | 1   |
| 345     | 460      | 1010    | 864     | 10128     | 4.90325 | 22165.7 | 0.152326 | 2749.97  | 1   |
| 332     | 465      | 1267    | 860     | 21110     | 4.68103 | 43667.4 | 0.300088 | 10988.2  | 1   |
| 320     | 451      | 1701    | 859     | 27617     | 10.3872 | 133604  | 0.918147 | 10082.6  | 1   |
| 275     | 476      | 1849    | 809     | 25013     | 5.28319 | 61511.4 | 0.422715 | 13078.6  | 1   |
| 272     | 509      | 1327    | 803     | 14296     | 4.25092 | 21197.9 | 0.145675 | 5292.9   | 1   |
| 266     | 490      | 1652    | 799     | 22162     | 4.29393 | 44206   | 0.30379  | 7023.43  | 1   |
| 252     | 493      | 2185    | 781     | 6320      | 2.50181 | 4488.63 | 0.030847 | 1213.75  | 1   |
| 234     | 761      | 671     | 777     | 15330     | 3.10396 | 21024.9 | 0.144486 | 6027.95  | 1   |
| 223     | 916      | 1797    | 763     | 5628      | 1.73478 | 3893.26 | 0.026755 | 697.014  | 1   |
| 143     | 581      | 1543    | 713     | 28107     | 6.10039 | 77454.3 | 0.532277 | 7026.38  | 1   |

Table SI. Continued.

| Spot ID | Match ID | Pixel X | Pixel Y | Intensity | Area    | Vol     | %Vol     | Saliency | Sel |
|---------|----------|---------|---------|-----------|---------|---------|----------|----------|-----|
| 131     | 593      | 1701    | 705     | 26463     | 6.26527 | 85482   | 0.587445 | 5444.79  | 1   |
| 94      | 609      | 1934    | 649     | 31213     | 3.11113 | 48935.9 | 0.336295 | 10550.5  | 1   |
| 1153    | 10       | 2457    | 2428    | 5032      | 9.04665 | 17792.2 | 0.115512 | 1496.47  | 1   |
| 1094    | 30       | 1940    | 2075    | 34299     | 13.3406 | 222473  | 1.44436  | 19351.9  | 1   |
| 1054    | 54       | 2145    | 1899    | 11734     | 7.92119 | 33137.3 | 0.215137 | 3775.58  | 1   |
| 1046    | 58       | 1805    | 1863    | 7662      | 4.97494 | 14186.7 | 0.092104 | 2933.81  | 1   |
| 1042    | 59       | 1941    | 1881    | 37607     | 18.9679 | 397565  | 2.58111  | 20960.9  | 1   |
| 1015    | 72       | 1588    | 1781    | 8564      | 4.20791 | 10223.7 | 0.066375 | 2728.17  | 1   |
| 862     | 170      | 1314    | 1379    | 7234      | 5.01795 | 13579.7 | 0.088164 | 2913.36  | 1   |
| 848     | 180      | 1426    | 1353    | 7090      | 3.10396 | 8305.38 | 0.053921 | 2693.56  | 1   |
| 841     | 179      | 1969    | 1342    | 7284      | 2.63084 | 7625.15 | 0.049505 | 2890.28  | 1   |
| 838     | 183      | 1667    | 1337    | 5204      | 3.22583 | 6743.82 | 0.043783 | 1937.21  | 1   |
| 789     | 216      | 1754    | 1242    | 13142     | 2.69536 | 10886.6 | 0.070679 | 4008.7   | 1   |
| 759     | 230      | 2132    | 1207    | 7552      | 2.45163 | 3877.83 | 0.025176 | 1346.87  | 1   |
| 715     | 273      | 1653    | 1130    | 10456     | 4.14339 | 16056.1 | 0.104241 | 3257.42  | 1   |
| 666     | 304      | 2015    | 1059    | 14598     | 4.87458 | 27135.2 | 0.17617  | 0        | 1   |
| 660     | 308      | 1972    | 1061    | 24507     | 6.07889 | 64469.2 | 0.418553 | 11551.2  | 1   |
| 644     | 321      | 1948    | 1027    | 6712      | 2.0932  | 5424.72 | 0.035219 | 2739.17  | 1   |
| 533     | 406      | 2176    | 934     | 18842     | 3.46239 | 26877.4 | 0.174496 | 6412.16  | 1   |
| 531     | 399      | 741     | 933     | 21078     | 4.8029  | 27276.7 | 0.177088 | 5394.21  | 1   |
| 489     | 451      | 1693    | 905     | 26577     | 10.0431 | 125785  | 0.816635 | 9617.05  | 1   |
| 467     | 465      | 1246    | 879     | 16628     | 4.50182 | 30978.7 | 0.201123 | 8733.75  | 1   |
| 460     | 460      | 993     | 870     | 13254     | 3.31902 | 18883.2 | 0.122596 | 7047.17  | 1   |
| 439     | 476      | 1840    | 846     | 22764     | 4.65953 | 46017   | 0.298756 | 12061.2  | 1   |
| 433     | 490      | 1642    | 841     | 18726     | 4.27243 | 36387.7 | 0.23624  | 7091.2   | 1   |
| 406     | 509      | 1307    | 819     | 9008      | 2.88174 | 9643.3  | 0.062607 | 4257.81  | 1   |
| 400     | 493      | 2186    | 816     | 7000      | 1.57707 | 4019.51 | 0.026096 | 2660.74  | 1   |
| 360     | 916      | 1789    | 784     | 4312      | 2.37277 | 3880.64 | 0.025194 | 1338.26  | 1   |
| 344     | 761      | 699     | 773     | 16516     | 2.55915 | 18917.2 | 0.122816 | 6869.1   | 1   |
| 261     | 581      | 1520    | 718     | 27119     | 6.85309 | 82017.8 | 0.532484 | 8354.34  | 1   |
| 252     | 593      | 1700    | 709     | 24270     | 6.43015 | 75635.5 | 0.491048 | 7116.09  | 1   |
| 212     | 609      | 1925    | 655     | 36629     | 3.72045 | 71819.5 | 0.466274 | 13918.5  | 1   |
| 1360    | 10       | 2460    | 2385    | 6740      | 7.61295 | 13683.8 | 0.061101 | 1269.27  | 1   |
| 1288    | 30       | 1970    | 2023    | 33783     | 14.6811 | 227445  | 1.0156   | 15484.4  | 1   |
| 1241    | 54       | 2156    | 1855    | 16610     | 8.70973 | 37349.2 | 0.166773 | 0        | 1   |
| 1226    | 58       | 1845    | 1815    | 9574      | 4.54483 | 10787.2 | 0.048167 | 1554.53  | 1   |
| 1223    | 59       | 1968    | 1828    | 37621     | 20.0575 | 407138  | 1.81797  | 20520.3  | 1   |
| 1191    | 72       | 1642    | 1743    | 8266      | 3.17565 | 10030.4 | 0.044788 | 3866.32  | 1   |
| 1000    | 170      | 1370    | 1375    | 18576     | 5.80649 | 44954.8 | 0.200734 | 7868.21  | 1   |
| 964     | 180      | 1488    | 1330    | 7644      | 3.18998 | 7545.98 | 0.033695 | 2204.95  | 1   |
| 939     | 179      | 1987    | 1295    | 8256      | 2.64518 | 6902.89 | 0.030823 | 2503.44  | 1   |
| 938     | 183      | 1709    | 1296    | 7112      | 2.77421 | 7664.23 | 0.034223 | 3217.72  | 1   |
| 879     | 216      | 1792    | 1201    | 10944     | 3.53407 | 13444.8 | 0.060034 | 4163.26  | 1   |
| 852     | 230      | 2134    | 1175    | 9462      | 2.54482 | 9698.08 | 0.043304 | 4016.85  | 1   |
| 767     | 273      | 1695    | 1093    | 22794     | 5.68462 | 54744.7 | 0.244449 | 8821.53  | 1   |
| 684     | 304      | 2026    | 1020    | 36587     | 4.1864  | 30097.3 | 0.134392 | 7075.83  | 1   |
| 678     | 308      | 1985    | 1017    | 23340     | 7.49825 | 67939   | 0.303364 | 8763.2   | 1   |
| 639     | 321      | 1966    | 985     | 6324      | 2.595   | 5754.64 | 0.025696 | 2505.63  | 1   |
| 580     | 399      | 743     | 956     | 15902     | 6.03588 | 43746.9 | 0.195341 | 5866.59  | 1   |
| 542     | 406      | 2175    | 925     | 24897     | 4.51616 | 61728.1 | 0.275631 | 4780.56  | 1   |
| 495     | 460      | 1025    | 893     | 9986      | 4.38712 | 17219.6 | 0.07689  | 2716.22  | 1   |
| 473     | 465      | 1302    | 888     | 24189     | 6.98929 | 78929.1 | 0.352438 | 12441.3  | 1   |
| 432     | 451      | 1724    | 869     | 30187     | 10.0072 | 153784  | 0.686683 | 10376    | 1   |
| 372     | 509      | 1368    | 825     | 19700     | 5.89251 | 47955.1 | 0.214131 | 8784.17  | 1   |
| 371     | 476      | 1861    | 819     | 23803     | 3.67027 | 42345.7 | 0.189084 | 8389.33  | 1   |
| 368     | 493      | 2185    | 813     | 12818     | 2.83156 | 13523.4 | 0.060385 | 4569.9   | 1   |
| 359     | 490      | 1678    | 811     | 22902     | 3.75629 | 42993.2 | 0.191975 | 8095.15  | 1   |
| 328     | 761      | 694     | 793     | 21724     | 5.24017 | 50157.2 | 0.223964 | 9925.29  | 1   |
| 206     | 581      | 1566    | 722     | 29955     | 7.13983 | 100432  | 0.448454 | 8382.16  | 1   |

Table SI. Continued.

| Spot ID | Match ID | Pixel X | Pixel Y | Intensity | Area    | Vol     | %Vol     | Saliency | Sel |
|---------|----------|---------|---------|-----------|---------|---------|----------|----------|-----|
| 203     | 593      | 1717    | 721     | 27745     | 6.36563 | 84639.6 | 0.377936 | 7112.58  | 1   |
| 147     | 609      | 1942    | 675     | 23956     | 2.55199 | 27393.4 | 0.122318 | 8141.1   | 1   |
| 1384    | 10       | 2427    | 2448    | 5860      | 6.27244 | 11461.2 | 0.048878 | 1187.77  | 1   |
| 1317    | 30       | 1935    | 2062    | 31581     | 16.6309 | 208073  | 0.887359 | 13781    | 1   |
| 1271    | 54       | 2122    | 1891    | 11138     | 9.48393 | 44370.3 | 0.189223 | 3552.54  | 1   |
| 1261    | 58       | 1799    | 1843    | 5252      | 4.32977 | 9661.12 | 0.041201 | 1423.28  | 1   |
| 1260    | 59       | 1932    | 1863    | 37153     | 22.1077 | 397556  | 1.69544  | 20658.5  | 1   |
| 1218    | 72       | 1590    | 1764    | 7554      | 4.0502  | 11664.9 | 0.049747 | 2984.66  | 1   |
| 1054    | 170      | 1330    | 1362    | 17208     | 6.83875 | 43369.7 | 0.184956 | 7650.35  | 1   |
| 1030    | 180      | 1439    | 1328    | 7034      | 3.90683 | 8511.29 | 0.036298 | 2096.21  | 1   |
| 1015    | 179      | 1959    | 1309    | 11368     | 3.1398  | 6817.5  | 0.029074 | 1056.2   | 1   |
| 1011    | 183      | 1663    | 1304    | 6462      | 2.70252 | 6902.61 | 0.029437 | 2669.43  | 1   |
| 957     | 216      | 1753    | 1205    | 8758      | 3.89966 | 12222.2 | 0.052124 | 3329.7   | 1   |
| 937     | 230      | 2116    | 1183    | 9092      | 2.85306 | 8723.35 | 0.037202 | 2914.98  | 1   |
| 869     | 273      | 1651    | 1095    | 24714     | 5.49107 | 46981.3 | 0.200358 | 8355.02  | 1   |
| 784     | 304      | 2002    | 1022    | 14692     | 4.61651 | 22938.2 | 0.097823 | 4159.16  | 1   |
| 776     | 308      | 1964    | 1020    | 21208     | 5.22584 | 47063.7 | 0.20071  | 9634.52  | 1   |
| 746     | 321      | 1944    | 987     | 4812      | 3.28317 | 5264.45 | 0.022451 | 1600.37  | 1   |
| 675     | 399      | 756     | 953     | 15872     | 6.82441 | 42588.5 | 0.181625 | 6064.08  | 1   |
| 632     | 406      | 2161    | 914     | 21951     | 4.40863 | 46301   | 0.197457 | 9661.98  | 1   |
| 564     | 460      | 1037    | 862     | 10240     | 3.01077 | 13426.7 | 0.05726  | 4132.63  | 1   |
| 520     | 465      | 1273    | 853     | 24869     | 6.13624 | 70147.4 | 0.299153 | 15784.6  | 1   |
| 514     | 451      | 1691    | 860     | 29529     | 10.3943 | 155166  | 0.661727 | 10108.1  | 1   |
| 434     | 476      | 1835    | 793     | 20638     | 5.31903 | 44939.9 | 0.191652 | 10496.5  | 1   |
| 431     | 761      | 705     | 792     | 17116     | 4.21508 | 31735.5 | 0.135341 | 6382.13  | 1   |
| 429     | 509      | 1329    | 793     | 19960     | 6.0072  | 48198.4 | 0.205549 | 10460.8  | 1   |
| 427     | 490      | 1644    | 790     | 20816     | 4.20791 | 40845.3 | 0.174191 | 11090.3  | 1   |
| 422     | 493      | 2176    | 787     | 12652     | 3.07529 | 16290   | 0.069471 | 5675.99  | 1   |
| 268     | 581      | 1537    | 685     | 28523     | 7.22585 | 110682  | 0.472017 | 8824.9   | 1   |
| 259     | 593      | 1698    | 666     | 25935     | 6.58068 | 84457.2 | 0.36018  | 6997.03  | 1   |
| 202     | 609      | 1931    | 613     | 34149     | 2.96776 | 47104.1 | 0.200882 | 3859.43  | 1   |
| 1173    | 10       | 2453    | 2419    | 6566      | 6.59502 | 11712.7 | 0.058411 | 1576.22  | 1   |
| 1105    | 30       | 1934    | 2059    | 31109     | 14.8746 | 183213  | 0.913678 | 14611.9  | 1   |
| 1068    | 54       | 2147    | 1899    | 10438     | 9.9212  | 39715.6 | 0.198061 | 3027.53  | 1   |
| 1054    | 59       | 1934    | 1867    | 36877     | 19.5772 | 362293  | 1.80675  | 20807.7  | 1   |
| 1053    | 58       | 1794    | 1844    | 7582      | 4.40863 | 9252.8  | 0.046144 | 1490.01  | 1   |
| 1026    | 72       | 1567    | 1752    | 6612      | 3.82081 | 7541.52 | 0.037609 | 1844.67  | 1   |
| 852     | 179      | 1967    | 1335    | 3338      | 3.62726 | 4611.4  | 0.022997 | 630.326  | 1   |
| 851     | 170      | 1297    | 1339    | 15804     | 4.9606  | 32290.2 | 0.16103  | 7348.76  | 1   |
| 843     | 183      | 1652    | 1322    | 5348      | 3.75629 | 7663.92 | 0.03822  | 2052.66  | 1   |
| 839     | 180      | 1410    | 1313    | 5216      | 4.49465 | 7887.8  | 0.039336 | 1512.52  | 1   |
| 784     | 216      | 1752    | 1231    | 6324      | 3.7778  | 8488.88 | 0.042334 | 1576.27  | 1   |
| 768     | 230      | 2134    | 1207    | 5226      | 3.40504 | 6765.06 | 0.033737 | 1766.08  | 1   |
| 704     | 273      | 1638    | 1118    | 20200     | 5.89968 | 50309.1 | 0.25089  | 6057.93  | 1   |
| 652     | 304      | 2024    | 1056    | 10050     | 5.15415 | 20410   | 0.101784 | 0        | 1   |
| 648     | 308      | 1978    | 1054    | 16592     | 4.85308 | 33381.6 | 0.166473 | 6013.64  | 1   |
| 628     | 321      | 1953    | 1023    | 5746      | 2.73837 | 5396.93 | 0.026914 | 1938.19  | 1   |
| 547     | 406      | 2190    | 955     | 19351     | 5.65595 | 49582.3 | 0.247265 | 7133.98  | 1   |
| 466     | 399      | 765     | 900     | 8496      | 6.55918 | 19302.2 | 0.09626  | 0        | 1   |
| 449     | 451      | 1683    | 896     | 25857     | 11.656  | 131979  | 0.658174 | 7845.41  | 1   |
| 410     | 476      | 1838    | 845     | 21818     | 4.37995 | 45167.2 | 0.225248 | 9509.39  | 1   |
| 397     | 465      | 1239    | 836     | 21286     | 5.26885 | 50362.9 | 0.251158 | 12742.4  | 1   |
| 387     | 490      | 1628    | 827     | 17350     | 4.23658 | 34761.1 | 0.173352 | 5962.9   | 1   |
| 382     | 493      | 2204    | 826     | 13636     | 2.76704 | 15686   | 0.078226 | 6627.64  | 1   |
| 370     | 460      | 1012    | 813     | 8586      | 4.05737 | 13002.2 | 0.064842 | 2893.9   | 1   |
| 331     | 509      | 1296    | 784     | 19168     | 5.78498 | 42976   | 0.21432  | 9677.18  | 1   |
| 280     | 761      | 718     | 748     | 15486     | 3.51973 | 24415.3 | 0.121759 | 5900.48  | 1   |
| 221     | 593      | 1689    | 706     | 20708     | 6.97495 | 64253.7 | 0.320431 | 5460.4   | 1   |
| 215     | 581      | 1510    | 704     | 28233     | 6.63086 | 87504.3 | 0.436382 | 8930.62  | 1   |

Table SI. Continued.

| Spot ID | Match ID | Pixel X | Pixel Y | Intensity | Area    | Vol     | %Vol     | Saliency | Sel |
|---------|----------|---------|---------|-----------|---------|---------|----------|----------|-----|
| 168     | 609      | 1931    | 660     | 32839     | 4.30827 | 65695   | 0.327619 | 8798.72  | 1   |
| 1425    | 10       | 2489    | 2440    | 4558      | 3.12547 | 6350.52 | 0.028644 | 0        | 0   |
| 1283    | 30       | 1955    | 2098    | 32435     | 14.294  | 200168  | 0.902861 | 14528    | 1   |
| 1242    | 54       | 2158    | 1925    | 9160      | 6.2366  | 25029.6 | 0.112896 | 2462.38  | 1   |
| 1233    | 58       | 1810    | 1893    | 6614      | 5.54125 | 12527.4 | 0.056505 | 2485.27  | 1   |
| 1232    | 59       | 1949    | 1913    | 37333     | 17.6919 | 358414  | 1.61663  | 21717.7  | 1   |
| 1196    | 72       | 1587    | 1802    | 9554      | 3.98569 | 9983    | 0.045029 | 1998.74  | 1   |
| 1024    | 170      | 1320    | 1401    | 20256     | 6.3728  | 53297.3 | 0.240398 | 10742.1  | 1   |
| 1012    | 179      | 1972    | 1371    | 6086      | 3.24016 | 5901.43 | 0.026619 | 1727.83  | 1   |
| 1011    | 180      | 1431    | 1368    | 6390      | 3.41937 | 7942.66 | 0.035826 | 2677.15  | 1   |
| 1004    | 183      | 1659    | 1360    | 5904      | 2.72403 | 6228.24 | 0.028093 | 2776.12  | 1   |
| 944     | 216      | 1751    | 1272    | 8952      | 3.92117 | 12623.9 | 0.05694  | 3779.29  | 1   |
| 918     | 230      | 2135    | 1241    | 10140     | 3.70611 | 13037.7 | 0.058807 | 3990.41  | 1   |
| 834     | 273      | 1645    | 1159    | 21010     | 5.82082 | 50351.3 | 0.227111 | 8761.13  | 1   |
| 773     | 304      | 2019    | 1092    | 12172     | 4.53049 | 19391.3 | 0.087465 | 4770.06  | 1   |
| 769     | 308      | 1974    | 1092    | 20758     | 6.17925 | 53093.3 | 0.239478 | 9872.58  | 1   |
| 743     | 321      | 1953    | 1059    | 6368      | 2.45163 | 4777.07 | 0.021547 | 1944.44  | 1   |
| 613     | 399      | 758     | 982     | 16628     | 7.42657 | 46704.6 | 0.210662 | 0        | 1   |
| 596     | 406      | 2176    | 980     | 23133     | 5.97853 | 57607   | 0.259837 | 7321.58  | 1   |
| 502     | 451      | 1680    | 932     | 26821     | 9.25453 | 126400  | 0.570131 | 8955.11  | 1   |
| 482     | 460      | 1021    | 905     | 10570     | 3.82798 | 6354.09 | 0.02866  | 1027.67  | 1   |
| 469     | 465      | 1258    | 905     | 26883     | 7.46958 | 104941  | 0.473337 | 15390.4  | 1   |
| 442     | 476      | 1841    | 882     | 21138     | 4.45164 | 41249.6 | 0.186057 | 7994.65  | 1   |
| 416     | 490      | 1626    | 867     | 24975     | 4.27959 | 42190.4 | 0.1903   | 7475.45  | 1   |
| 413     | 493      | 2189    | 863     | 14204     | 2.63084 | 15942.8 | 0.07191  | 5259.41  | 1   |
| 386     | 973      | 1622    | 845     | 4354      | 1.51255 | 2786.55 | 0.012569 | 480.372  | 1   |
| 384     | 509      | 1319    | 852     | 19592     | 6.51617 | 49965.1 | 0.225368 | 8215.9   | 1   |
| 353     | 761      | 706     | 836     | 23201     | 8.15059 | 68293.9 | 0.308041 | 7728.3   | 1   |
| 345     | 916      | 1788    | 823     | 5786      | 2.25808 | 4800.74 | 0.021654 | 2192.33  | 1   |
| 228     | 581      | 1514    | 762     | 30315     | 4.91759 | 73431.2 | 0.331213 | 10022.4  | 1   |
| 200     | 593      | 1683    | 752     | 24387     | 6.17925 | 76790.7 | 0.346366 | 8292.09  | 1   |
| 157     | 609      | 1931    | 693     | 33105     | 2.71686 | 44478   | 0.200619 | 9697.81  | 1   |
| 1413    | 10       | 2450    | 2465    | 8974      | 6.7814  | 15887.8 | 0.070594 | 0        | 0   |
| 1275    | 30       | 1956    | 2110    | 34349     | 12.6022 | 204644  | 0.909291 | 17451.8  | 1   |
| 1229    | 54       | 2149    | 1927    | 10908     | 8.07173 | 28514.6 | 0.126698 | 3056.41  | 1   |
| 1216    | 58       | 1828    | 1898    | 8262      | 5.08964 | 15552.7 | 0.069105 | 3737.67  | 1   |
| 1213    | 59       | 1955    | 1915    | 37595     | 18.7671 | 369738  | 1.64285  | 20720.8  | 1   |
| 1186    | 72       | 1628    | 1823    | 6770      | 4.23658 | 10606.3 | 0.047127 | 2409.56  | 1   |
| 1027    | 170      | 1358    | 1433    | 19970     | 7.56994 | 62258.8 | 0.276633 | 8957.05  | 1   |
| 1005    | 180      | 1479    | 1391    | 5860      | 4.07888 | 9609.98 | 0.0427   | 2031.5   | 1   |
| 986     | 179      | 1982    | 1359    | 7564      | 3.06095 | 7820.15 | 0.034747 | 2665.3   | 1   |
| 984     | 183      | 1702    | 1356    | 9028      | 2.75987 | 7177.48 | 0.031892 | 2765.36  | 1   |
| 931     | 216      | 1786    | 1263    | 9952      | 3.99285 | 14873   | 0.066085 | 4808.99  | 1   |
| 906     | 230      | 2140    | 1227    | 8466      | 3.93551 | 12184   | 0.054137 | 3488.91  | 1   |
| 848     | 273      | 1692    | 1153    | 22486     | 6.02154 | 58107   | 0.258186 | 11823    | 1   |
| 789     | 304      | 2027    | 1078    | 15520     | 4.59501 | 25090.4 | 0.111484 | 7926.99  | 1   |
| 785     | 308      | 1984    | 1078    | 23917     | 6.46599 | 66230.4 | 0.29428  | 12368.9  | 1   |
| 753     | 321      | 1964    | 1044    | 5902      | 2.62367 | 5743.99 | 0.025522 | 1977.99  | 1   |
| 692     | 399      | 773     | 1002    | 18126     | 7.89252 | 61738.8 | 0.274323 | 8171.24  | 1   |
| 646     | 406      | 2185    | 966     | 26565     | 8.45883 | 109732  | 0.487569 | 5766.33  | 1   |
| 593     | 460      | 1043    | 918     | 5956      | 4.20074 | 7970.76 | 0.035416 | 1509.89  | 1   |
| 589     | 465      | 1285    | 926     | 27445     | 7.37639 | 89345.1 | 0.396985 | 14443    | 1   |
| 570     | 451      | 1724    | 918     | 27083     | 9.79217 | 135444  | 0.601815 | 9759.01  | 1   |
| 504     | 509      | 1349    | 864     | 15668     | 5.75631 | 36907.6 | 0.163991 | 8393.31  | 1   |
| 494     | 476      | 1859    | 857     | 22382     | 4.01436 | 34825   | 0.154737 | 10737.5  | 1   |
| 492     | 490      | 1678    | 855     | 21664     | 4.59501 | 49393.5 | 0.219469 | 10435    | 1   |
| 470     | 973      | 1681    | 834     | 8490      | 1.8208  | 6949.29 | 0.030878 | 1648.76  | 1   |
| 467     | 493      | 2200    | 836     | 13322     | 2.89607 | 16650   | 0.073981 | 6426.72  | 1   |
| 453     | 761      | 721     | 835     | 24361     | 5.08964 | 61197.7 | 0.271919 | 13195.7  | 1   |

Table SI. Continued.

| Spot ID | Match ID | Pixel X | Pixel Y | Intensity | Area    | Vol     | %Vol     | Saliency | Sel |
|---------|----------|---------|---------|-----------|---------|---------|----------|----------|-----|
| 426     | 916      | 1815    | 796     | 7558      | 1.76345 | 5274.91 | 0.023438 | 2655.66  | 1   |
| 344     | 581      | 1565    | 742     | 26621     | 4.51616 | 64931   | 0.288507 | 11482.1  | 1   |
| 302     | 593      | 1725    | 730     | 25695     | 6.47316 | 81211   | 0.360843 | 10377.8  | 1   |
| 264     | 609      | 1943    | 672     | 32871     | 2.7312  | 41706.8 | 0.185315 | 8481.96  | 1   |
| 1456    | 10       | 2440    | 2478    | 6368      | 5.29035 | 12969.6 | 0.05557  | 0        | 0   |
| 1309    | 30       | 1926    | 2112    | 31277     | 12.1363 | 174876  | 0.749281 | 16029    | 1   |
| 1266    | 54       | 2125    | 1936    | 10322     | 8.20793 | 30958.3 | 0.132646 | 3177.05  | 1   |
| 1256    | 59       | 1927    | 1913    | 35509     | 16.4302 | 308218  | 1.3206   | 19246.6  | 1   |
| 1255    | 58       | 1783    | 1894    | 5658      | 6.47316 | 14123.9 | 0.060516 | 1743.49  | 1   |
| 1217    | 72       | 1554    | 1799    | 6542      | 3.77063 | 8903.42 | 0.038148 | 2101.71  | 1   |
| 1052    | 170      | 1277    | 1391    | 21060     | 7.02513 | 60972.3 | 0.261244 | 9466.74  | 1   |
| 1032    | 179      | 1957    | 1357    | 4934      | 2.86023 | 5516.49 | 0.023636 | 1834.85  | 1   |
| 1030    | 180      | 1398    | 1356    | 6730      | 3.65594 | 8587.42 | 0.036794 | 2908.82  | 1   |
| 1029    | 183      | 1639    | 1351    | 5536      | 3.31902 | 6550.36 | 0.028066 | 1944.57  | 1   |
| 969     | 216      | 1738    | 1255    | 6124      | 6.82441 | 15040   | 0.064441 | 1264.2   | 1   |
| 936     | 230      | 2120    | 1219    | 7732      | 4.15056 | 10482.8 | 0.044915 | 3056.98  | 1   |
| 868     | 273      | 1628    | 1145    | 22546     | 5.86383 | 55780   | 0.238997 | 8504.32  | 1   |
| 793     | 304      | 2016    | 1068    | 9120      | 5.55559 | 18255   | 0.078216 | 2585.99  | 1   |
| 792     | 308      | 1969    | 1071    | 21766     | 6.24376 | 48071.7 | 0.20597  | 8673.39  | 1   |
| 773     | 321      | 1949    | 1037    | 4404      | 2.70969 | 4499.7  | 0.01928  | 1304.86  | 1   |
| 651     | 406      | 2156    | 958     | 27581     | 5.63444 | 84063.5 | 0.360182 | 8565.33  | 1   |
| 606     | 399      | 730     | 922     | 18098     | 5.871   | 50629.5 | 0.216929 | 5725.34  | 1   |
| 567     | 451      | 1673    | 907     | 27103     | 9.56995 | 128304  | 0.549739 | 9292.92  | 1   |
| 538     | 465      | 1222    | 888     | 27583     | 8.03589 | 110528  | 0.473572 | 15648.6  | 1   |
| 508     | 476      | 1838    | 852     | 19242     | 4.70254 | 37650.3 | 0.161318 | 9035.13  | 1   |
| 488     | 490      | 1622    | 840     | 20072     | 4.36562 | 42760.2 | 0.183212 | 9048.45  | 1   |
| 460     | 493      | 2170    | 827     | 16236     | 2.50181 | 17296.6 | 0.07411  | 8089.75  | 1   |
| 446     | 509      | 1292    | 825     | 17930     | 6.67387 | 43881.9 | 0.188019 | 8656.46  | 1   |
| 437     | 973      | 1621    | 809     | 3894      | 2.11471 | 3737.23 | 0.016013 | 1077.87  | 1   |
| 420     | 916      | 1781    | 791     | 4452      | 2.66668 | 4313.89 | 0.018484 | 1166.77  | 1   |
| 408     | 761      | 697     | 793     | 27283     | 6.67387 | 79294.5 | 0.339749 | 10913.2  | 1   |
| 273     | 581      | 1509    | 708     | 27047     | 5.74197 | 78665.2 | 0.337053 | 10626    | 1   |
| 270     | 593      | 1681    | 708     | 21770     | 6.7814  | 74336.6 | 0.318506 | 8371.6   | 1   |
| 219     | 609      | 1925    | 656     | 28537     | 2.80288 | 38021.1 | 0.162907 | 5598.6   | 1   |

Pixel X and Y, the location of the spot; Area, the area of the spot; Vol, the volume of the spot; saliency, the saliency of the spot; Sel, the number of selected spots for mass spectrometry analysis.

Table SII. Thirty matched proteins with significant difference in expression.

| Match ID | Match count | Expression |      |         | ANOVA | Protein |
|----------|-------------|------------|------|---------|-------|---------|
|          |             | Control    | FGR  | Taurine |       |         |
| 10       | 3           | 0.05       | 0.06 | 0.11    | 0.01  | Snca    |
| 30       | 3           | 0.85       | 0.94 | 1.37    | 0.00  | Prdx2   |
| 54       | 3           | 0.12       | 0.18 | 0.2     | 0.00  | Hn1     |
| 58       | 3           | 0.06       | 0.05 | 0.08    | 0.00  | Uchl1   |
| 59       | 3           | 1.53       | 1.77 | 2.38    | 0.00  | Uchl1   |
| 72       | 3           | 0.04       | 0.04 | 0.07    | 0.00  | Pgls    |
| 170      | 3           | 0.26       | 0.18 | 0.13    | 0.00  | Ldhb    |
| 179      | 3           | 0.03       | 0.03 | 0.05    | 0.03  | Commd   |
| 180      | 3           | 0.04       | 0.04 | 0.07    | 0.00  | Adprh   |
| 183      | 3           | 0.03       | 0.03 | 0.04    | 0.01  | Crk     |
| 216      | 3           | 0.06       | 0.05 | 0.08    | 0.01  | Tmod2   |
| 230      | 3           | 0.05       | 0.04 | 0.03    | 0.01  | Sea1    |
| 273      | 3           | 0.24       | 0.23 | 0.14    | 0.01  | Ckb     |
| 304      | 3           | 0.09       | 0.11 | 0.16    | 0.04  | Psmc3   |
| 308      | 3           | 0.25       | 0.22 | 0.38    | 0.03  | Stl3    |
| 321      | 3           | 0.02       | 0.03 | 0.03    | 0.00  | Dctn2   |
| 406      | 3           | 0.37       | 0.24 | 0.18    | 0.05  | Tubb3   |
| 451      | 3           | 0.57       | 0.67 | 0.87    | 0.00  | Hspd1   |
| 460      | 3           | 0.02       | 0.07 | 0.13    | 0.00  | Pdia3   |
| 465      | 3           | 0.45       | 0.3  | 0.23    | 0.01  | Pdia3   |
| 476      | 3           | 0.17       | 0.2  | 0.35    | 0.00  | Ina     |
| 490      | 3           | 0.2        | 0.18 | 0.26    | 0.01  | Gzmk    |
| 493      | 3           | 0.07       | 0.07 | 0.03    | 0.00  | Hnrnpk  |
| 509      | 3           | 0.19       | 0.21 | 0.1     | 0.01  | Dpysl3  |
| 581      | 3           | 0.32       | 0.45 | 0.51    | 0.00  | Afp     |
| 593      | 3           | 0.34       | 0.35 | 0.51    | 0.01  | Vcp     |
| 609      | 3           | 0.18       | 0.22 | 0.39    | 0.02  | Dpysl2  |
| 761      | 3           | 0.31       | 0.16 | 0.13    | 0.00  | Dpysl2  |
| 916      | 2           | 0.02       | 0    | 0.03    | 0.00  | Kng1    |
| 973      | 1           | 0.02       | 0    | 0       | 0.01  | Hnrnpk  |

FGR, fetal growth restriction.
